# Supplementary material for: Changes in dispensing of medicines proposed for re-purposing in the first year of the COVID-19 pandemic in Australia
Source: PubMed Central journal article supplement (PMC9200317; doi:10.1371/journal.pone.0269482), 2022-06-15
Supplement: pone.0269482.s001.pdf [file pone.0269482.s001.pdf]

**S1 Table:** List of pharmaceutical treatments reviewed by the National COVID-19 taskforce as of July 2021 and their availability in Australia

| <b>Medicine name</b> | <b>National COVID-19 Clinical Evidence Taskforce recommendation</b> | <b>Availability in Australia*</b>                                                                  |
|----------------------|---------------------------------------------------------------------|----------------------------------------------------------------------------------------------------|
| Azithromycin         | Do not use                                                          | PBS-subsidised (S85)                                                                               |
| Hydroxychloroquine   | Do not use                                                          | PBS-subsidised (S85)                                                                               |
| Ivermectin           | Do not use outside clinical trials                                  | PBS-subsidised (S85)                                                                               |
| Colchicine           | Do not use                                                          | PBS-subsidised (S85)                                                                               |
| Corticosteroids      | Use                                                                 | PBS-subsidised (S85)                                                                               |
| Calcitriol           | Do not use outside clinical trials                                  | PBS-subsidised (S85); other vitamin D analogues such as calcifediol are available over-the-counter |

PBS = Pharmaceutical Benefits Scheme; S85 = Section 85 (Section 85 is the general schedule and refers to items dispensed by community pharmacies)
