# Supplementary material for: Changes in dispensing of medicines proposed for re-purposing in the first year of the COVID-19 pandemic in Australia
Source: PubMed Central journal article supplement (PMC9200317; doi:10.1371/journal.pone.0269482), 2022-06-15
Supplement: pone.0269482.s002.pdf [file pone.0269482.s002.pdf]

**S2 Table.** Monthly change in dispensing in 2020 compared with predicted values estimated using ARIMA models with full aggregate Section 85 dispensing data

| Month in 2020 | Azithromycin                      | Hydroxychloroquine                | Ivermectin                        | Colchicine                        |
|---------------|-----------------------------------|-----------------------------------|-----------------------------------|-----------------------------------|
|               | Change in dispensings, n (95% CI) | Change in dispensings, n (95% CI) | Change in dispensings, n (95% CI) | Change in dispensings, n (95% CI) |
| Mar           | 69 (-1033 to 1171)                | 24799 (23887 to 25711)            | 142 (-31 to 316)                  | 7106 (5814 to 8397)               |
| Apr           | -5867 (-7042 to -4692)            | 4977 (4042 to 5912)               | 22 (-154 to 198)                  | -2640 (-3936 to -1344)            |
| May           | -8883 (-10142 to -7624)           | -7032 (-8025 to -6038)            | 520 (344 to 696)                  | -3888 (-5232 to -2545)            |
| Jun           | -6748 (-7922 to -5575)            | -4736 (-5742 to -3731)            | 221 (47 to 396)                   | 2457 (799 to 4114)                |
| Jul           | -7533 (-8796 to -6269)            | -2382 (-3379 to -1386)            | 80 (-97 to 257)                   | 880 (-774 to 2533)                |
| Aug           | -9229 (-10404 to -8055)           | -1898 (-2871 to -926)             | 263 (86 to 439)                   | 231 (-1523 to 1984)               |
| Sep           | -7804 (-8995 to -6613)            | -1287 (-2240 to -335)             | 399 (224 to 574)                  | 4695 (2812 to 6578)               |
| Oct           | -8640 (-9808 to -7472)            | -2048 (-3004 to -1091)            | 55 (-120 to 231)                  | 1743 (-127 to 3613)               |
| Nov           | -7132 (-8316 to -5948)            | -1197 (-2130 to -265)             | 220 (45 to 395)                   | 1647 (-344 to 3638)               |

| Month in 2020 | Corticosteroids                   | Calcitriol                        | All medicines                     |
|---------------|-----------------------------------|-----------------------------------|-----------------------------------|
|               | Change in dispensings, n (95% CI) | Change in dispensings, n (95% CI) | Change in dispensings, n (95% CI) |
| Mar           | 87195 (66643 to 107747)           | 3698 (3256 to 4140)               | 5110790 (4350937 to 5870644)      |
| Apr           | -98233 (-124238 to -72229)        | -418 (-888 to 52)                 | -2865463 (-3623925 to -2107001)   |
| May           | -145302 (-176357 to -114246)      | -1283 (-1756 to -810)             | -3924526 (-4705203 to -3143850)   |
| Jun           | -112895 (-148176 to -77614)       | 830 (355 to 1305)                 | -582967 (-1531222 to 365288)      |
| Jul           | -117706 (-156781 to -78631)       | 367 (-110 to 844)                 | -1002106 (-1951755 to -52458)     |
| Aug           | -127310 (-169837 to -84783)       | 148 (-332 to 628)                 | -1881239 (-2871030 to -891448)    |
| Sep           | -102474 (-148194 to -56754)       | 866 (384 to 1348)                 | -268893 (-1339225 to 801440)      |
| Oct           | -90971 (-139675 to -42267)        | 139 (-345 to 623)                 | -1217241 (-2295849 to -138633)    |
| Nov           | -59540 (-111056 to -8025)         | 262 (-225 to 749)                 | -877041 (-2000055 to 245974)      |

ARIMA = autoregressive integrated moving average models
