# Supplementary material for: Changes in dispensing of medicines proposed for re-purposing in the first year of the COVID-19 pandemic in Australia
Source: PubMed Central journal article supplement (PMC9200317; doi:10.1371/journal.pone.0269482), 2022-06-15
Supplement: pone.0269482.s003.pdf [file pone.0269482.s003.pdf]

**S3 Table.** Monthly change in new users in 2020 compared with predicted values estimated using ARIMA models with a 10% sample of PBS data where the dispensing date is offset by +/- 14 days

| Month in 2020 | Azithromycin                      | Hydroxychloroquine                | Ivermectin                        | Colchicine                        |
|---------------|-----------------------------------|-----------------------------------|-----------------------------------|-----------------------------------|
|               | Change in dispensings, n (95% CI) | Change in dispensings, n (95% CI) | Change in dispensings, n (95% CI) | Change in dispensings, n (95% CI) |
| Mar           | -61 (-148 to 27)                  | 415 (385 to 446)                  | -1 (-18 to 17)                    | 14 (-64 to 91)                    |
| Apr           | -510 (-597 to -423)               | 150 (119 to 182)                  | -5 (-22 to 13)                    | -42 (-126 to 42)                  |
| May           | -500 (-588 to -411)               | -37 (-67 to -8)                   | 37 (20 to 55)                     | -142 (-235 to -50)                |
| Jun           | -380 (-471 to -290)               | -21 (-51 to 8)                    | 3 (-14 to 21)                     | 46 (-47 to 138)                   |
| Jul           | -503 (-589 to -416)               | 11 (-18 to 41)                    | 1 (-16 to 19)                     | -1 (-101 to 100)                  |
| Aug           | -603 (-690 to -516)               | 17 (-13 to 46)                    | 27 (10 to 45)                     | -44 (-148 to 60)                  |
| Sep           | -620 (-706 to -533)               | -12 (-42 to 19)                   | 22 (5 to 40)                      | 121 (15 to 227)                   |
| Oct           | -610 (-697 to -523)               | 6 (-25 to 37)                     | 3 (-14 to 21)                     | 21 (-91 to 132)                   |
| Nov           | -496 (-583 to -410)               | 33 (3 to 62)                      | 6 (-11 to 24)                     | -63 (-178 to 52)                  |

| Month in 2020 | Corticosteroids                   | Calcitriol                        |
|---------------|-----------------------------------|-----------------------------------|
|               | Change in dispensings, n (95% CI) | Change in dispensings, n (95% CI) |
| Mar           | 358 (-1077 to 1793)               | 18 (-13 to 49)                    |
| Apr           | -4157 (-5914 to -2400)            | -35 (-69 to -1)                   |
| May           | -6778 (-8807 to -4749)            | -11 (-47 to 25)                   |
| Jun           | -7229 (-9498 to -4960)            | 26 (-12 to 64)                    |
| Jul           | -7217 (-9702 to -4732)            | 18 (-22 to 58)                    |
| Aug           | -7121 (-9805 to -4437)            | -1 (-43 to 41)                    |
| Sep           | -6411 (-9281 to -3541)            | -5 (-49 to 39)                    |
| Oct           | -4611 (-7655 to -1567)            | 46 (0 to 92)                      |
| Nov           | -2820 (-6028 to 388)              | 21 (-26 to 68)                    |

ARIMA = autoregressive integrated moving average models
