# Supplementary material for: Changes in dispensing of medicines proposed for re-purposing in the first year of the COVID-19 pandemic in Australia
Source: PubMed Central journal article supplement (PMC9200317; doi:10.1371/journal.pone.0269482), 2022-06-15
Supplement: pone.0269482.s004.pdf [file pone.0269482.s004.pdf]

**S4 Table.** Monthly change in dispensing in 2020 compared with predicted values estimated using ARIMA models with 10% sample of PBS data where the dispensing date is offset by +/- 14 days

| Month in 2020 | Azithromycin                      | Hydroxychloroquine                | Ivermectin                        | Colchicine                        |
|---------------|-----------------------------------|-----------------------------------|-----------------------------------|-----------------------------------|
|               | Change in dispensings, n (95% CI) | Change in dispensings, n (95% CI) | Change in dispensings, n (95% CI) | Change in dispensings, n (95% CI) |
| Mar           | 89 (-53 to 231)                   | 316 (222 to 411)                  | -7 (-34 to 20)                    | 217 (96 to 337)                   |
| Apr           | -28 (-231 to 174)                 | 1884 (1785 to 1984)               | -7 (-34 to 21)                    | 479 (358 to 599)                  |
| May           | -616 (-862 to -369)               | 750 (646 to 855)                  | -12 (-40 to 15)                   | -28 (-149 to 92)                  |
| Jun           | -702 (-988 to -416)               | -391 (-500 to -281)               | 48 (21 to 76)                     | -165 (-312 to -18)                |
| Jul           | -536 (-857 to -215)               | -353 (-467 to -239)               | 23 (-5 to 50)                     | 47 (-106 to 201)                  |
| Aug           | -794 (-1142 to -446)              | -184 (-302 to -65)                | 1 (-27 to 29)                     | 188 (35 to 341)                   |
| Sep           | -788 (-1164 to -412)              | -115 (-238 to 8)                  | 22 (-6 to 50)                     | -62 (-232 to 108)                 |
| Oct           | -859 (-1260 to -457)              | -109 (-236 to 18)                 | 64 (36 to 91)                     | 358 (189 to 527)                  |
| Nov           | -931 (-1356 to -505)              | -91 (-222 to 40)                  | 23 (-5 to 50)                     | 63 (-119 to 244)                  |

| Month in 2020 | Corticosteroids                   | Calcitriol                        |
|---------------|-----------------------------------|-----------------------------------|
|               | Change in dispensings, n (95% CI) | Change in dispensings, n (95% CI) |
| Mar           | 1787 (175 to 3399)                | 154 (53 to 256)                   |
| Apr           | 5686 (3406 to 7966)               | 263 (159 to 368)                  |
| May           | -6983 (-9776 to -4190)            | 31 (-76 to 139)                   |
| Jun           | -12010 (-15235 to -8785)          | -68 (-178 to 41)                  |
| Jul           | -11372 (-14977 to -7767)          | 91 (-22 to 203)                   |
| Aug           | -10177 (-14126 to -6228)          | 22 (-93 to 138)                   |
| Sep           | -11139 (-15405 to -6873)          | 36 (-81 to 154)                   |
| Oct           | -9876 (-14436 to -5316)           | 41 (-79 to 162)                   |
| Nov           | -7491 (-12328 to -2654)           | 111 (-11 to 234)                  |

ARIMA = autoregressive integrated moving average models
